# Supplementary material for: Transcriptomic profiling of nonneoplastic cortical tissues reveals epileptogenic mechanisms in dysembryoplastic neuroepithelial tumors
Source: Springer Nature journal article supplement (doi:10.1007/s10142-022-00869-1), 2022-05-28
Supplement: 10142_2022_869_MOESM4_ESM.pdf [file 10142_2022_869_MOESM4_ESM.pdf]

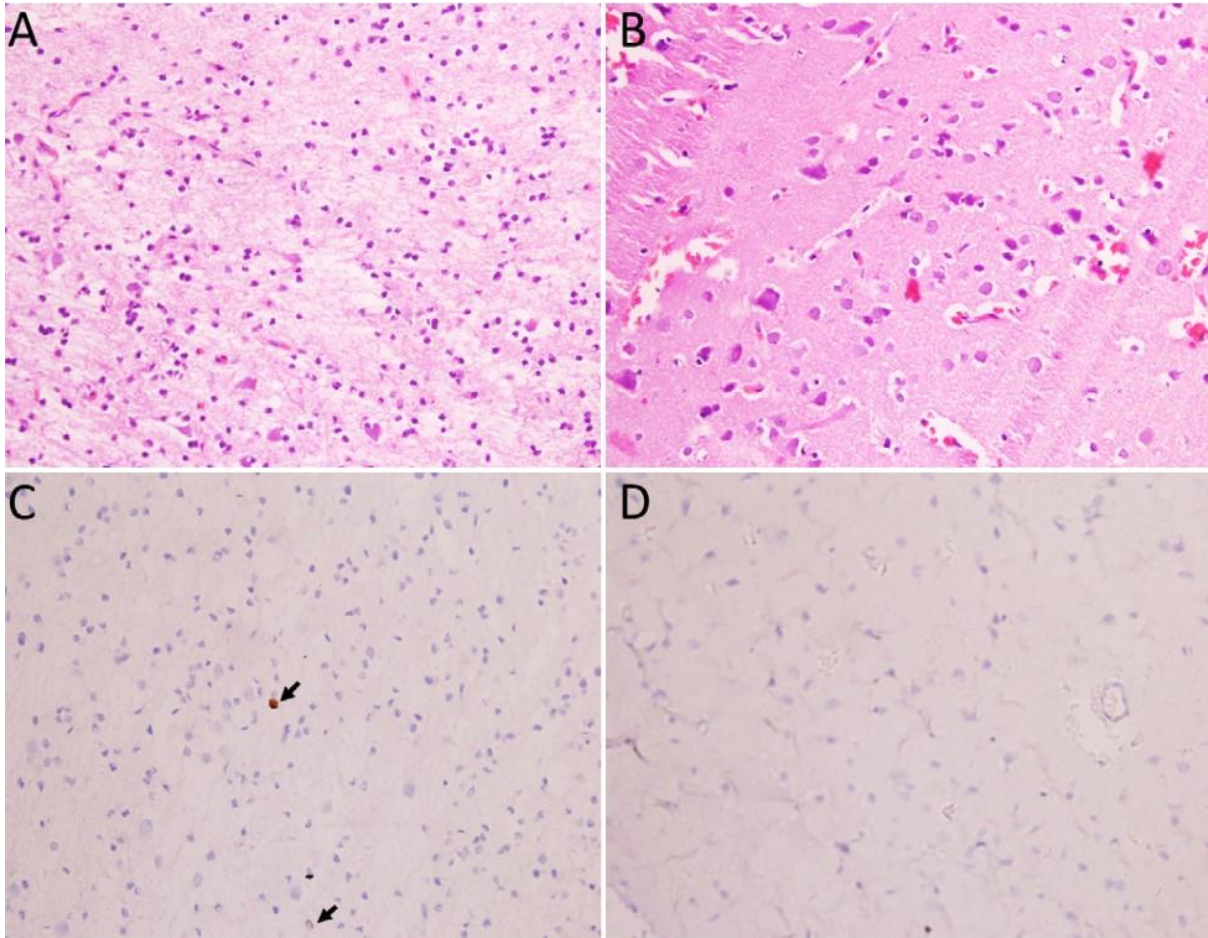

**Figure S1. Histologic examination of the DNT neoplasm and ECTs.** Photomicrograph shows DNT neoplasm (H&E staining) **(A)** with an occasional nucleus exhibiting positive Ki67 immunostaining (arrowheads) **(C)**. Proliferating cells were absent in the epileptogenic peritumoral cortical tissue (ECT) (H&E staining) **(B)** as shown by negligible Ki67 immuno-positive cells **(D)**. Ki67 staining was performed as described previously [Dey et al., 2021].

**References:**

Dey S, Doddamani RS, Banerjee Dixit A, Tripathi M, Sharma MC, Chandra PS, & Banerjee J. Altered spontaneous glutamatergic and GABAergic activity in the peritumoral cortex of low-grade gliomas presenting with history of seizures. *Front Neurosci* 2021; 15:689769.
